# Supplementary material
Source: HighWire-hosted journal article supplement (http://www.cmaj.ca/highwire/filestream/58719/field_highwire_adjunct_files/4/insulin-yu-5-at.pdf)

## Appendix 5: Forest plots depicting comparisons between insulin regimens

Note: CI = confidence interval, HbA<sub>1c</sub> = glycolated hemoglobin A<sub>1c</sub>, MDI = multiple daily injections (basal-bolus regimen), OAHA = oral antihyperglycemic agent, RE Model = random-effects model.

See Appendix 3 for citations of studies included in the meta-analyses.

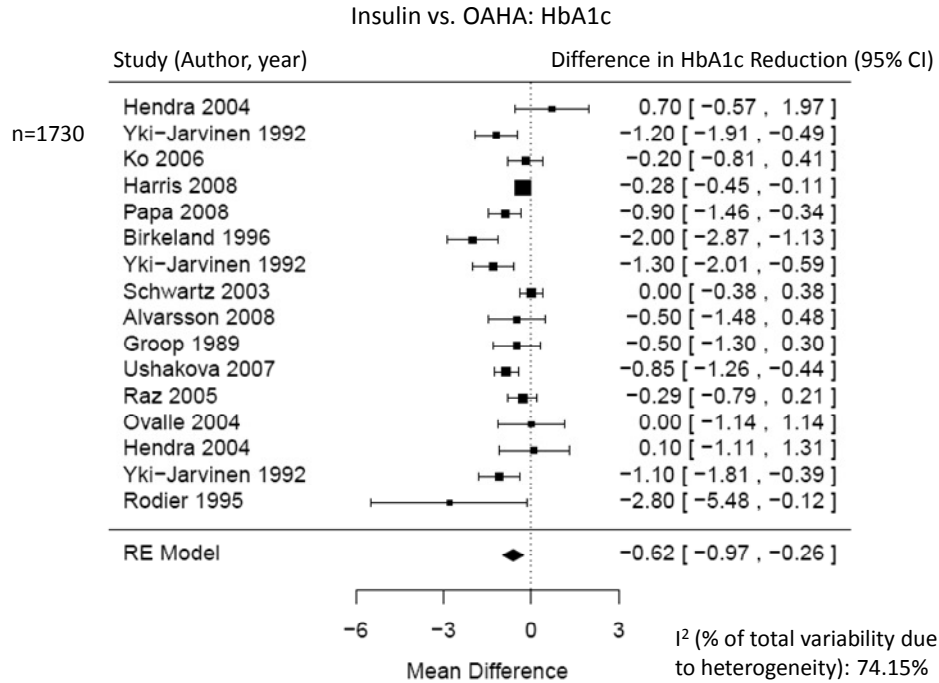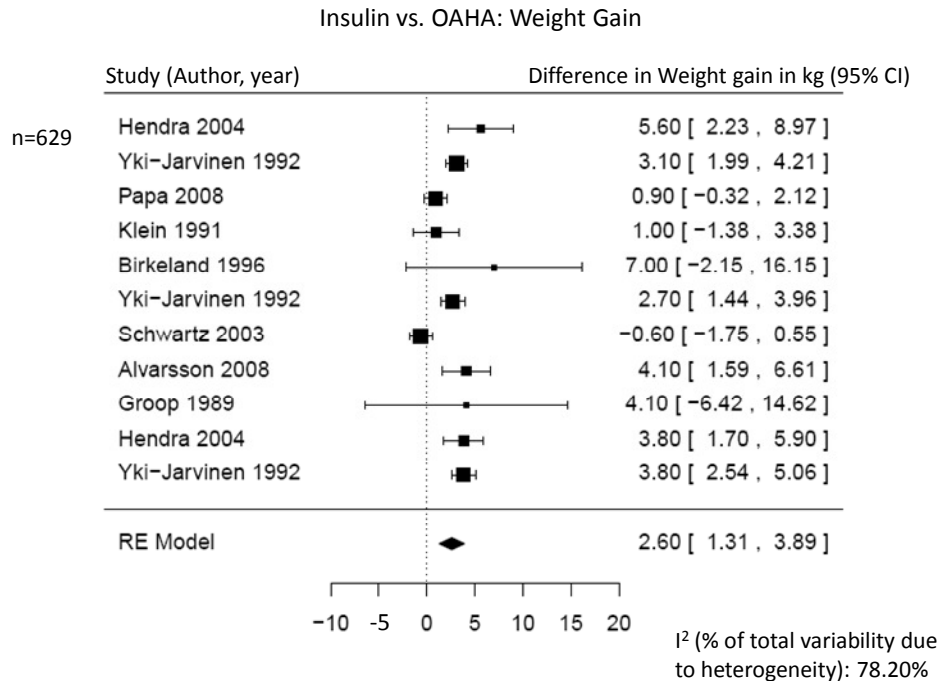

Insulin vs. OAHA: Hypoglycemia

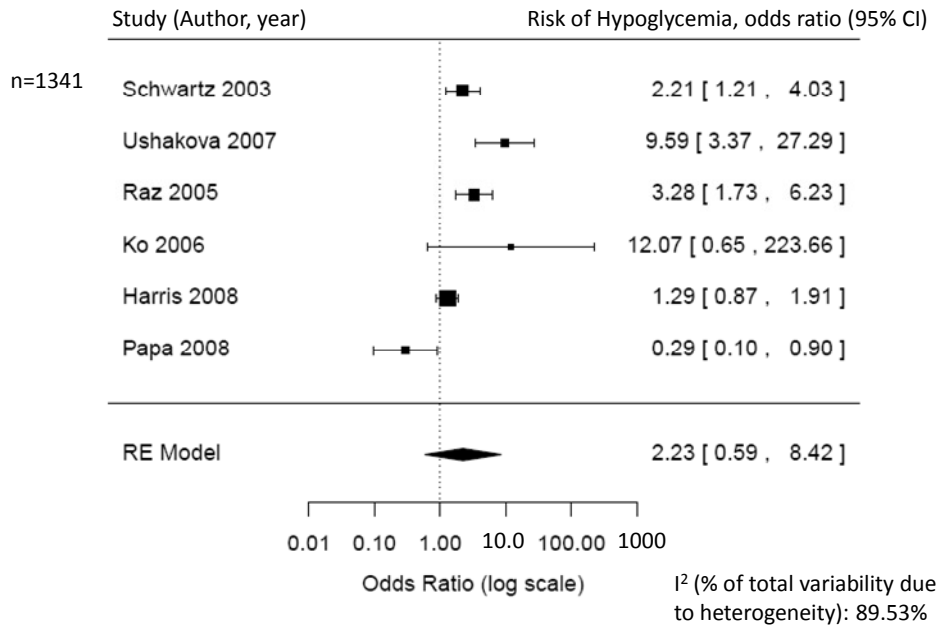

Insulin regimen – Premixed vs. Basal\*: HbA1c

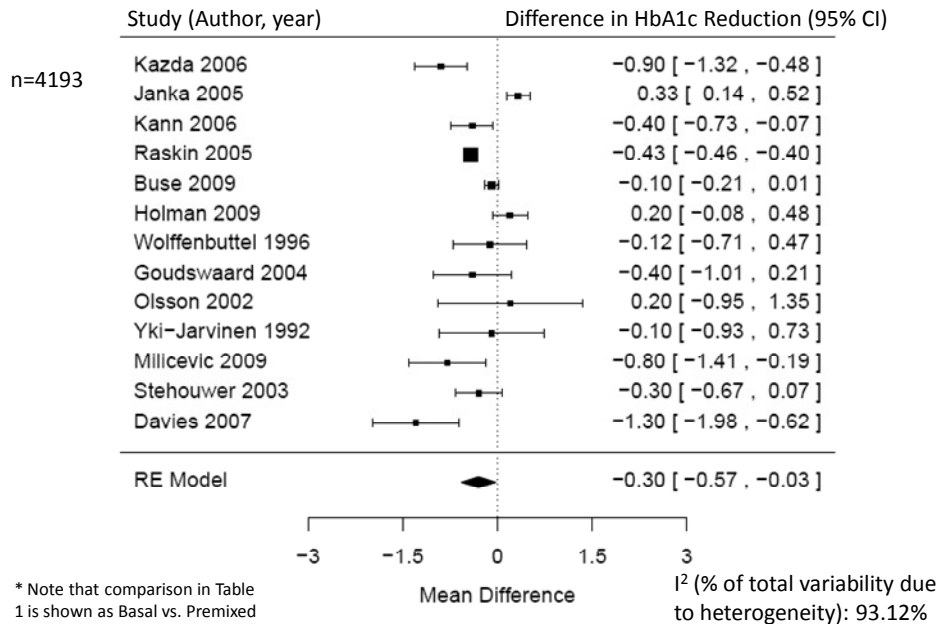

\* Note that comparison in Table 1 is shown as Basal vs. Premixed

Insulin regimen – Premixed vs. Basal\*: Weight Gain

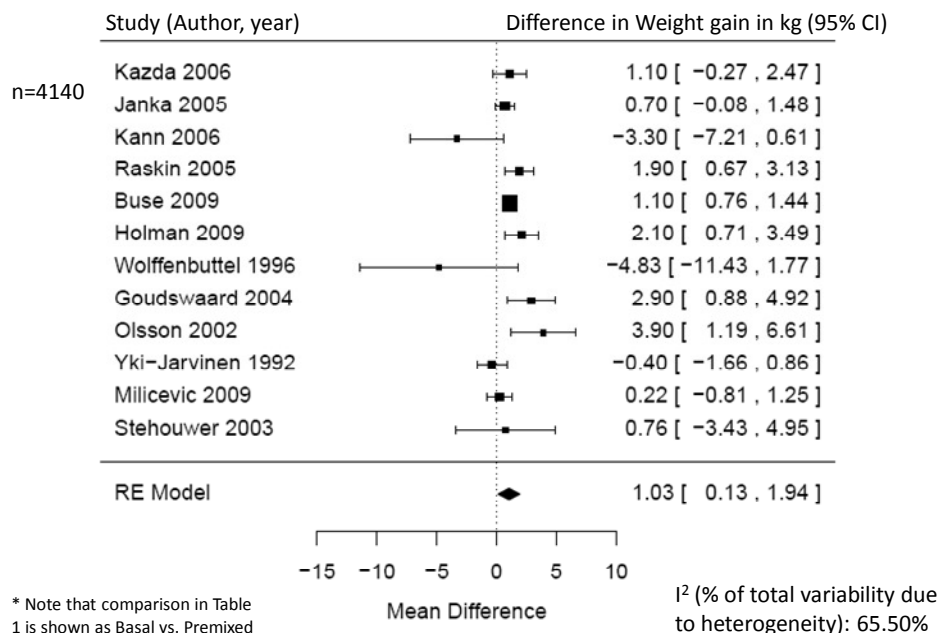

Insulin regimen – Premixed vs. Basal\*: Hypoglycemia

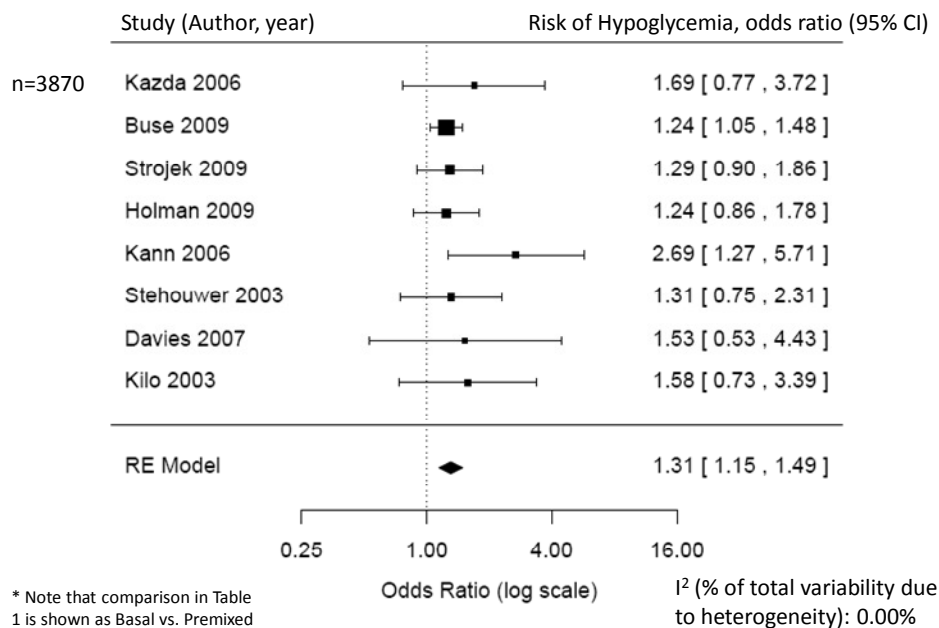

### Insulin regimen – Basal vs. MDI: HbA1c

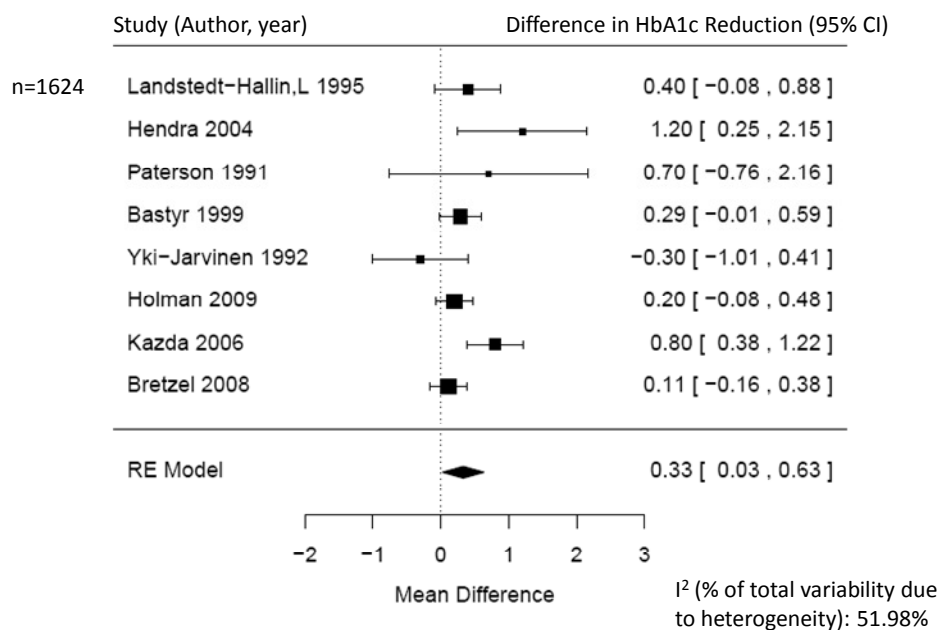

### Insulin regimen – Basal vs. MDI: Weight Gain

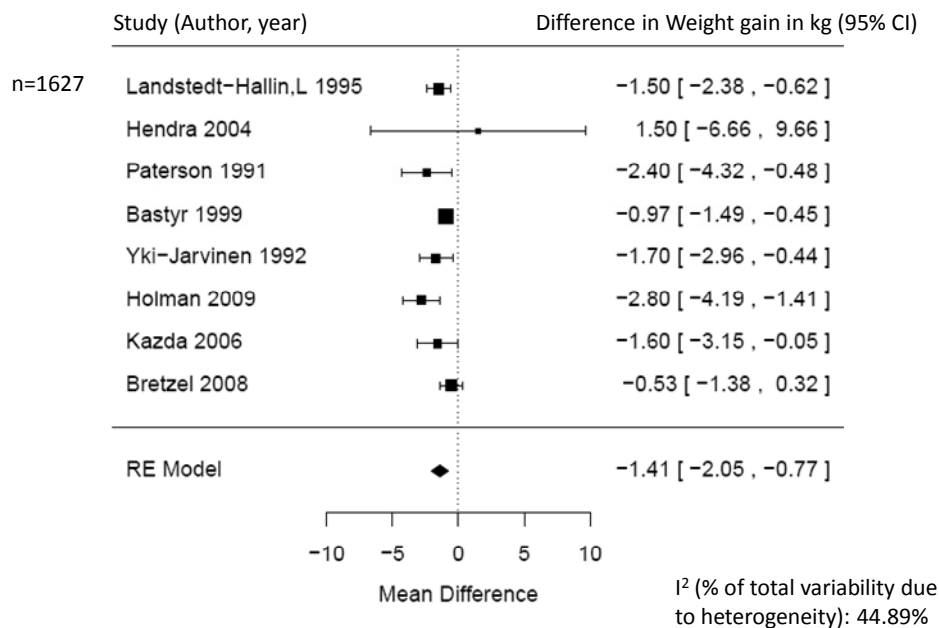

Insulin regimen – MDI vs. Basal\*: Hypoglycemia

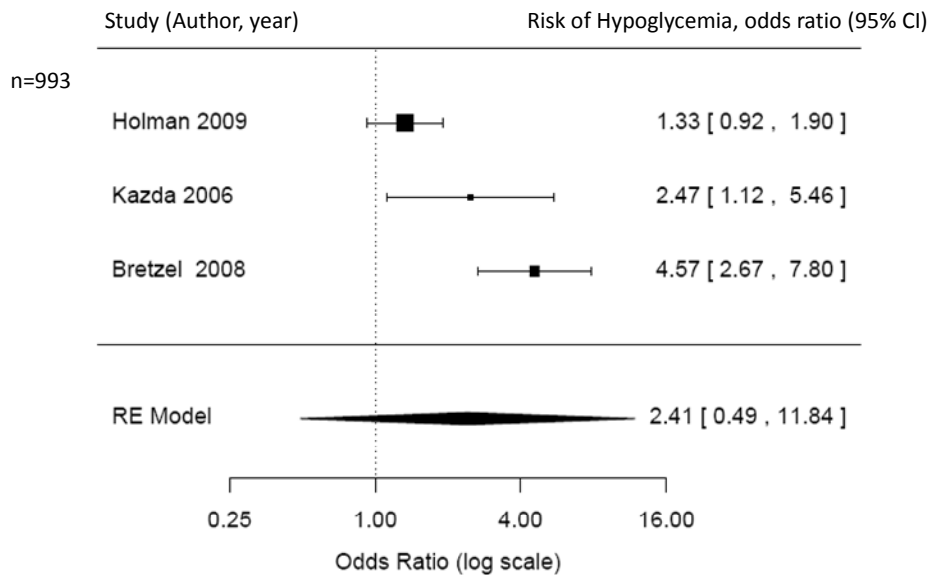

\* Note that comparison in Table 1 is shown as Basal vs. MDI

I<sup>2</sup> (% of total variability due to heterogeneity): 82.78%

Insulin regimen Premixed vs. MDI: HbA1c

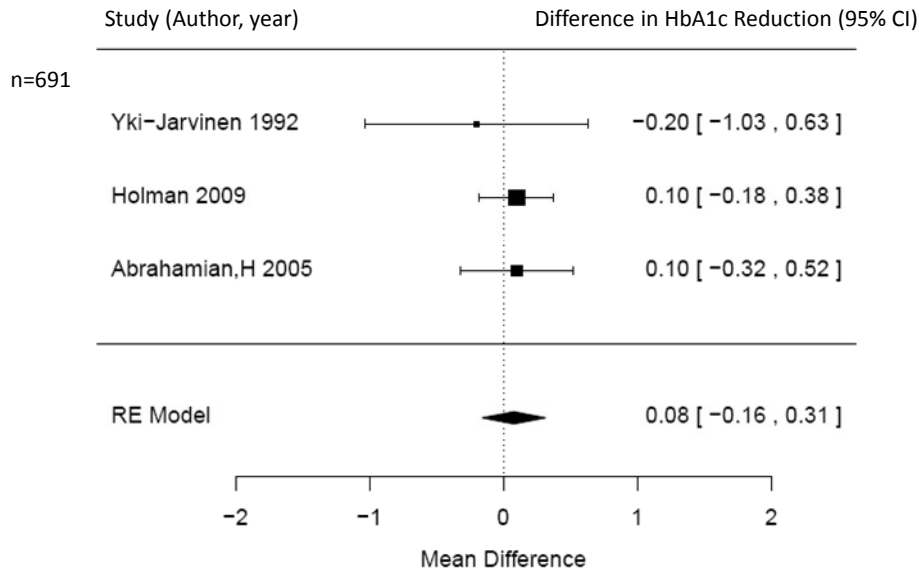

I<sup>2</sup> (% of total variability due to heterogeneity): 0.00%

Insulin regimen Intermediate vs. Long-acting: HbA1c

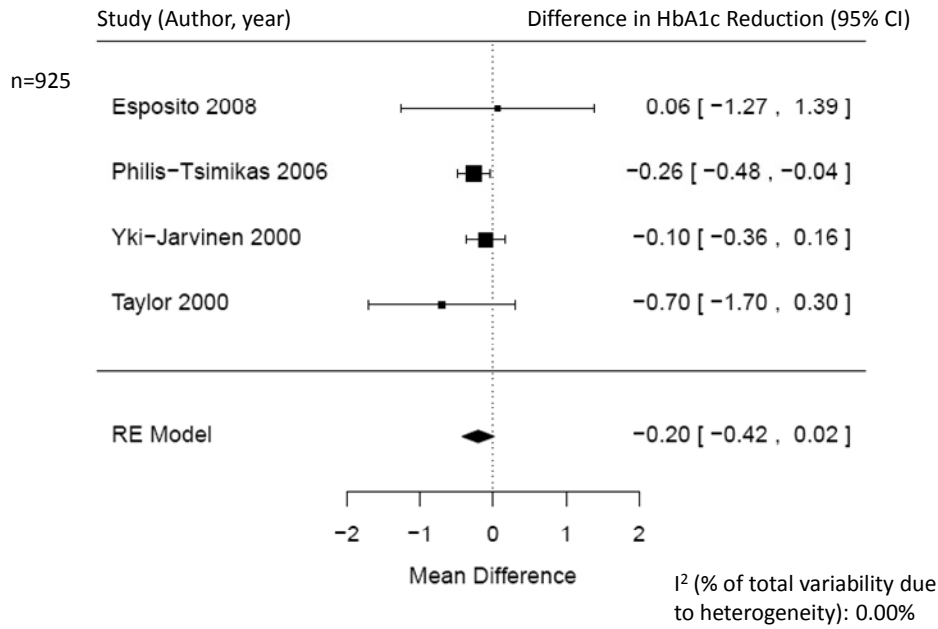

Insulin regimen Intermediate vs. Long-acting: Weight Gain

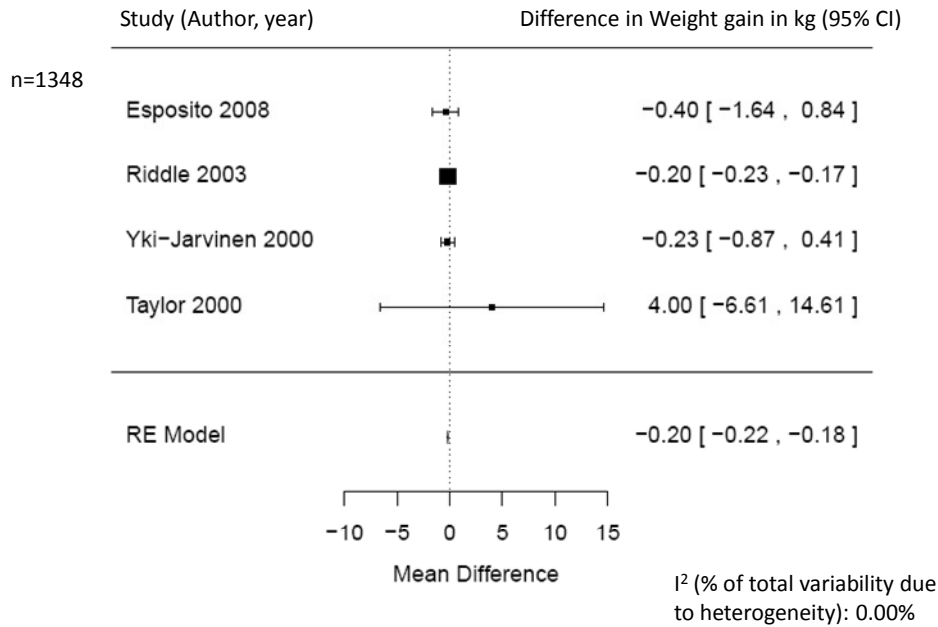

Insulin regimen Intermediate vs. Long-acting: Hypoglycemia

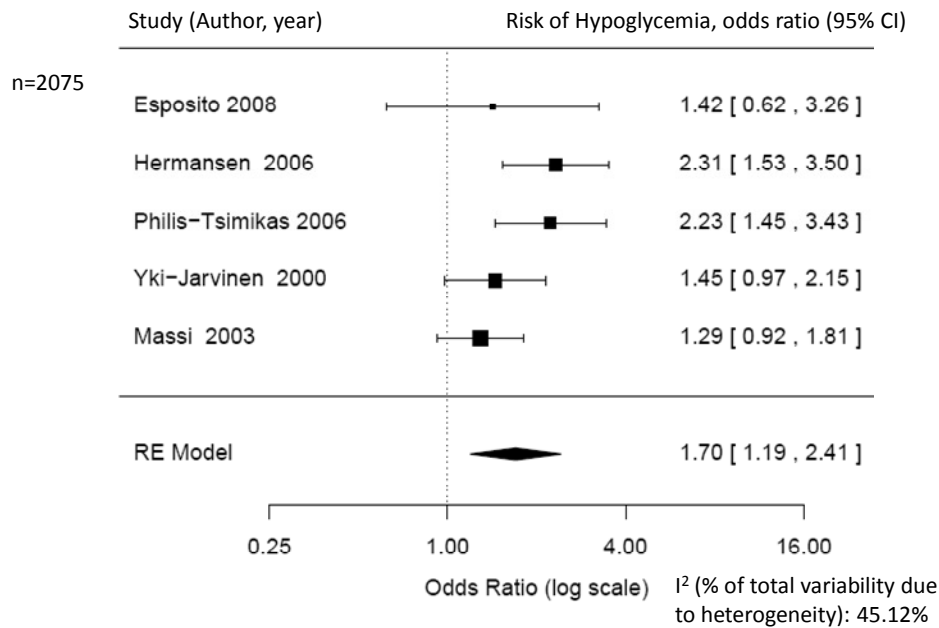

Insulin regimen Basal AM vs. Basal PM: HbA1c

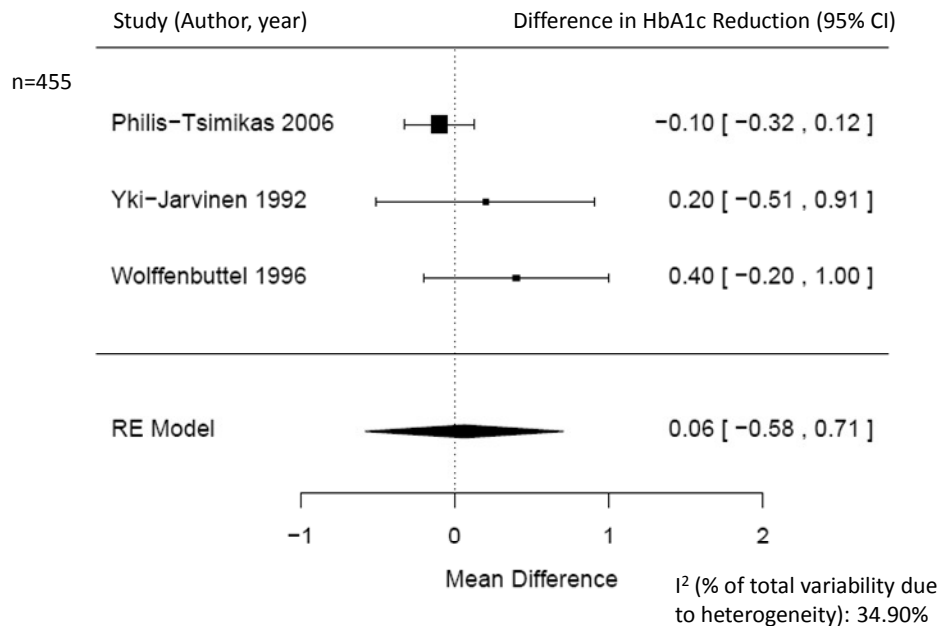

Insulin regimen Basal AM vs. Basal PM: Weight Gain

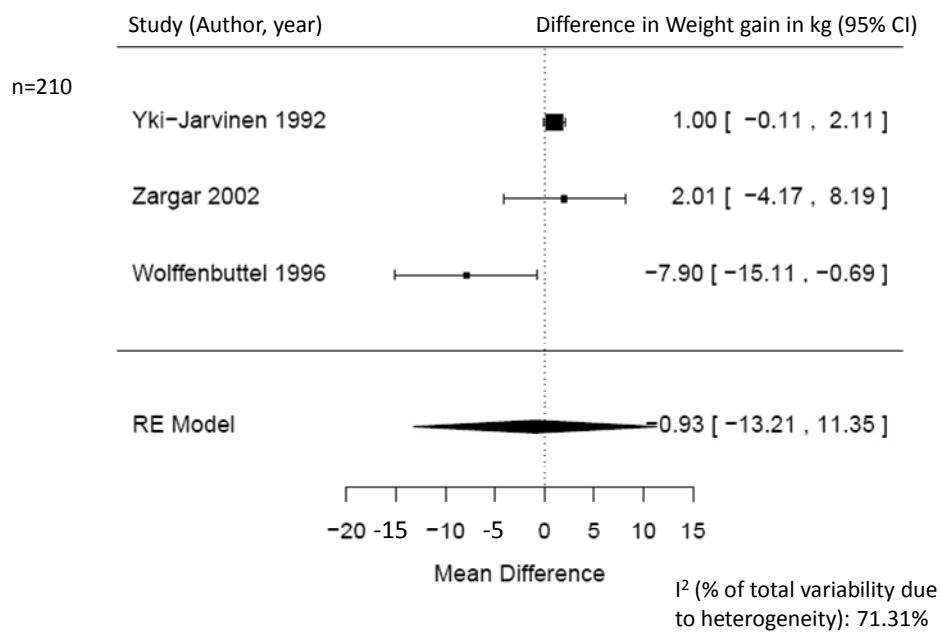



### Insulin vs. Insulin + OAHA: Weight Gain

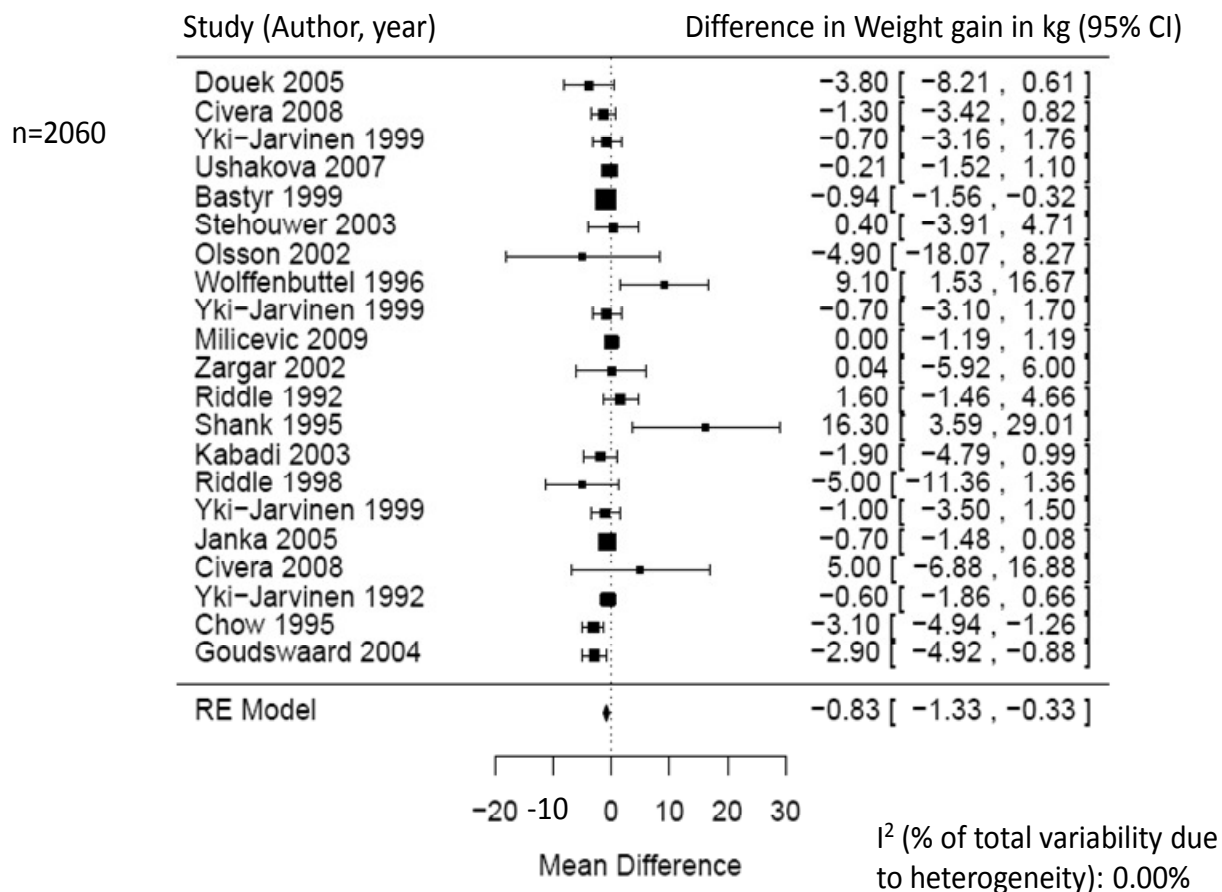

### Insulin vs. Insulin + OAHA: Insulin dose

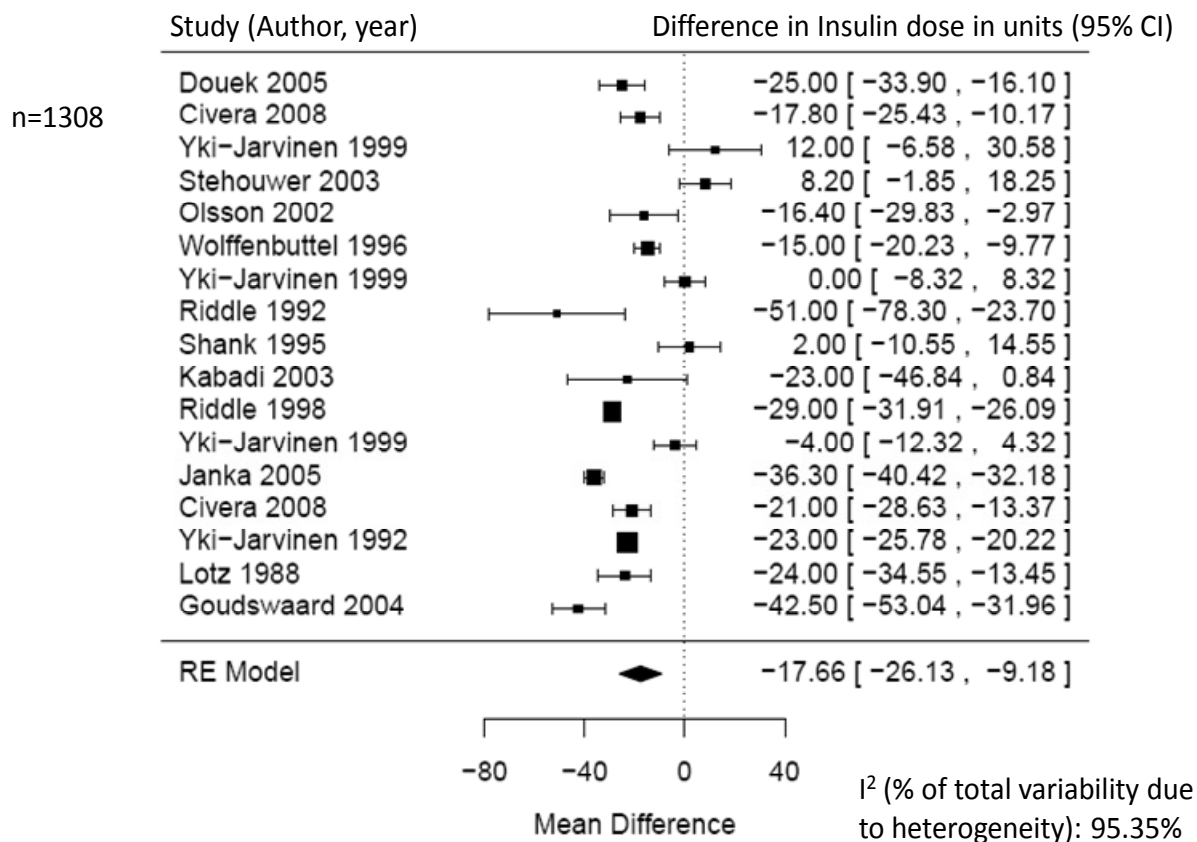

### Insulin vs. Insulin + OAHA: Hypoglycemia

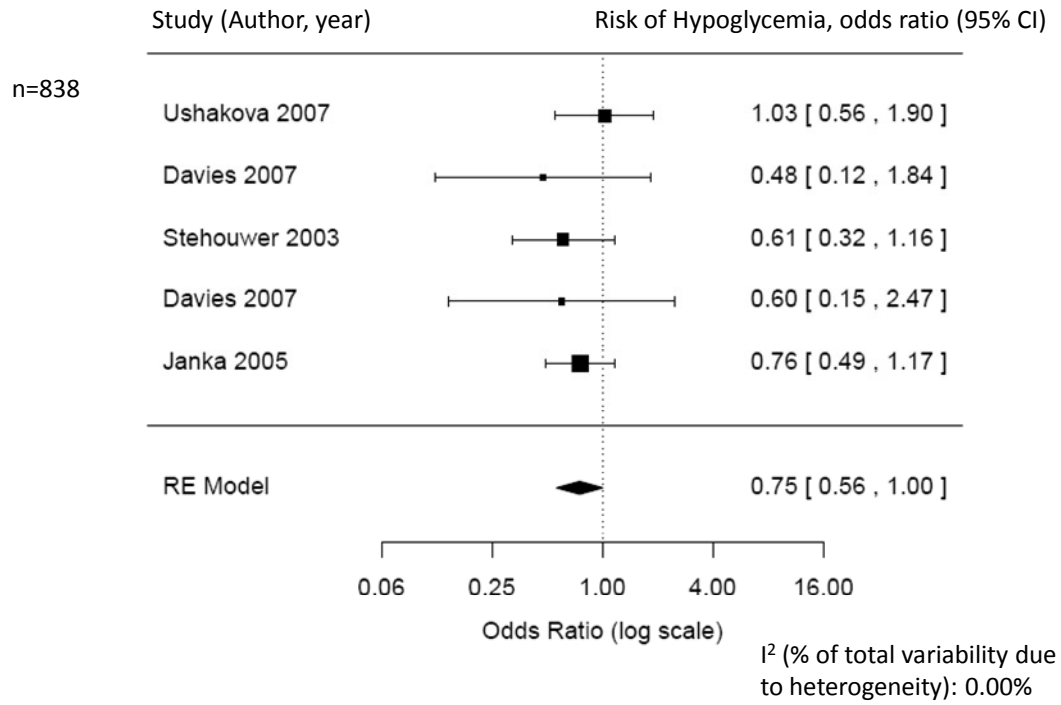

Supplement: insulin-yu-5-at.pdf [file insulin-yu-5-at.pdf]
